# Supplementary material for: From Heinrich Events to cyclic ice streaming: the grow-and-surge instability in the Parallel Ice Sheet Model
Source: Copernicus journal article supplement (doi:10.5194/tc-2016-235), 2016-10-31
Supplement: Supplementary file [file tc-2016-235-AC1-supplement.zip]

## Detailed response to the editor on manuscript tc-2016-235

“From Heinrich Events to cyclic ice streaming: the grow-and-surge instability in the Parallel Ice Sheet Model”

by J. Feldmann and A. Levermann

Dear Prof Vieli,

We would like to thank you for handling the review process and the reviewers for their detailed look at our manuscript. We are happy for the very positive assessment of the Reviewer #1 and the recommendation of the publication of our manuscript. We would also like to thank Reviewer #2 for the overall positive review and the very constructive and helpful comments. Following the reviewer's main request, i.e., to expand our results section, we carried out numerous additional simulations and we think that the new results coming out of them definitely add to our study. Also we are confident that with the revision of our manuscript we address the other issues raised by Reviewer #2. Three new figures (Figs. 7, 8 and 10) and a new section (Sec. 3.3, “Role of basal sliding law”) have been added to the manuscript. Revising the manuscript, we also took into account the valuable recommendations given in a short comment by a third reviewer. Last but not least, we picked up the suggestions by the Editor to discuss our prescribed calving condition (p. 4, l. 15-19) and also elaborate on the rather large yield stresses found in our experiments (p. 6, l. 1-12).

We would like to highlight that our new simulations include, but are not limited to, a parameter study in which we explore 1) the role of the basal sliding law and 2) the influence of bed strength on the surge dynamics. Though this was not requested by Reviewer #2 it covers several of his requests. In our simulations the sliding law was fixed (sliding law exponent  $q=1/3$ ) but now spans the range from purely plastic sliding ( $q=0$ ) to linear sliding ( $q=1$ ). Also the bed roughness was rather confined to a small set of parameter values but now a wide range from very slippery to rough bed conditions is represented in our study. The resulting two-dimensional parameter space in particular allows to infer the conditions that promote or inhibit surging as well as a discussion of the time scale of the surge cycle in our simulations.

Please find below the *reviewers' comments in italics* and [our detailed response in blue](#). We have further attached a revised manuscript that highlights the changes in the submission, as well as a clean revised version.

Best wishes,

J. Feldmann and A. Levermann

**Interactive comment on “From Heinrich Events to cyclic ice streaming: the grow-and-surge instability in the Parallel Ice Sheet Model”**

**by**

**Johannes Feldmann and Anders Levermann**

Anonymous Referee #1

Received and published: 21 November 2016

*I provide a very cursory review because on initial quick skimming, it is clear that the manuscript is well constructed and that the scientific methodology supports well the conclusions drawn. The paper documents further an important form of ice flow variability that may have a bearing on how ice-flow developments in Antarctica are viewed in the future. (It would be interesting, for example, to address what is "really" the situation with Thwaites Glacier—a topic that is often linked with immediate effects of climate change. Attributing changes at Thwaites to just the developments of the last decade or 2 would bring one to question whether there were alternative explanations, e.g., is the outlet glacier subject to oscillations of the type shown in this manuscript.)*

We would like to thank the reviewer for the effort to review our manuscript and are glad for the very positive assessment. We are pleased that the reviewer recommends our paper for publication. The question whether glaciers like Thwaites Glacier show large-scale instability (marine ice sheet instability) or are rather subject to oscillations comparable to these in our simulations would indeed be a very interesting one. It might be an exciting topic for future work.

## Interactive comment on “From Heinrich Events to cyclic ice streaming: the grow-and-surge instability in the Parallel Ice Sheet Model”

by

Johannes Feldmann and Anders Levermann

S. L. Cornford (Referee)

s.l.cornford@bristol.ac.uk

Received and published: 23 December 2016

*This paper describes and application of the very respectable PISM ice sheet model to idealized simulations of surge cycles in marine ice streams. It differs from other studies in the same sort of area by modelling both longitudinal and lateral stresses (as opposed to just one or neither) without parametrizations. I think it has the basis of a good paper, but I think it needs an extra result or two to make it a really good paper. Ideally, I would have like to have seen the experimental design include the MISMP+ reverse slopes (where buttressing or the lack of really matters), but I think that might be too much to ask for. So instead, I'd like to suggest that the authors also carry out some simulations with the linear sliding law.*

We would like to thank the reviewer for the positive assessment of our manuscript and the very constructive and helpful comments. As asked for by the reviewer, we carried out a several sets of additional simulations and are confident that the results coming out of them further enrich our study. The reviewer's main request to also run experiments that use the linear version of the applied sliding law inspired us to carry out a parameter study which explores the full range of the sliding exponent  $m$  in the sliding law (Eq. 1). Previously this parameter was fixed in our simulations ( $q=1/3$ ) but now spans the range from  $q=0$  (purely plastic sliding law) to  $q=1$  (linear sliding law). Another suggestion by the reviewer (see next reviewer comment) was to carry out further simulations with a modified basal traction coefficient, i.e., the till friction angle  $\phi$ . Consequently we vary  $\phi$  covering the range from very slippery to very rough bed conditions for each of the prescribed values of  $m$  which allows us to explore the  $q$ - $\phi$  parameter space. The analysis of the results is done in the newly added Section 3.3, including the location of the different flow regimes within the  $q$ - $\phi$  space and an investigation of the influence of both parameters on the period duration of the surge cycle and ice volume (see new Fig. 10). In the revised discussion/conclusion section we discuss the new findings also in the light of results from other studies (p. 9, l. 3-31).

*On page 6, I see that the paper suggests that either the nonlinear sliding law or the more natural treatment of buttressing is responsible for differences with the Robel 2016 paper (linear sliding, parametrized buttressing). By choosing a basal traction coefficient such that the ice sheet is comparable (e.g. same GL position at furthest advance), this can be tested in some more detail (i.e. if the results are still different, it must be the buttressing treatment)*

One outcome of our parameter-space investigation is that in the particular case of linear sliding ( $q=1$ ) the ice sheet takes on a very different shape compared to the  $q=1/3$  case in our simulations. There is few to no grounded ice inside the channel (mostly ice shelf) and only a few 10 m of grounded ice thickness outside the channel which. This qualitatively different behavior is independent of the friction parameter  $\phi$  and thus the comparison suggested by the reviewer is not feasible for the specific setup.

Motivated by the fact that the ice sheet is generally very thin for large  $q$  (particularly in the linear case), we conducted further simulations with increased surface accumulation. However, even in simulations which use an accumulation rate which is up to 10 times larger than the default value,

barely any grounded ice forms inside the channel. The evolution of a proper ice sheet comparable to the ice sheet in the mentioned study of Robel et al. 2016 for the particular case of  $m=1$  might be achieved by the exploration of further model parameters (e.g. drainage rate  $C_d$  or basal velocity scaling parameter  $u_0$ ). However, given the amount of simulations we already conducted for this study, this would be clearly beyond our means and we hope for the understanding of the reviewer.

General Comments —————

*The feedback diagrams are a nice idea to make the subject easier to understand. I wonder if the first of these figures (and the text that describes it) needs a little work. It is not so difficult to understand that there are some negative feedbacks e.g*

*$H \rightarrow + \rightarrow V \rightarrow - \rightarrow H$*

*and some positive feedbacks e.g*

*$W \rightarrow + \rightarrow V \rightarrow + \rightarrow W$*

*but the key to all of this is in the detail of when and why one dominates. I don't really read that from the diagrams. Also, there is a mix of degree-of-freedom variables ( $H, V, W$ ) and derived quantities (basal traction, flux), I think this could be simplified.*

We are glad that the reviewer likes our idea of using feedback diagrams to visualize the main feedback mechanism. We fully agree with the reviewer that our feedback loops include derived variables. For instance, the basal shear stress  $\tau_b$  is a quantity derived from velocity  $V$ , i.e.,  $\tau_b = f(V)$  (see Eq. 1). However, at same time  $V$  can also be understood as a function of  $\tau_b$  since  $\tau_b$  has a strong influence on  $V$  through the SSA equation. Thus, when drawing the feedback loops in Fig. 2, we do not want to claim them to be of the mathematical exactness of, e.g., Feynman diagrams, but consider them as an illustration of the main mechanisms in the presented surge simulations, including the variables that we find to be most relevant. Leaving out or introducing additional (derived) variables would simplify the loop (at the expense information loss) or add complexity to it. A suitable analogy which came to our mind is the sea ice-albedo feedback, stating that more ice area ( $A$ ) leads to higher albedo ( $\alpha$ ) which in turn leads to a larger ice area. The simple positive feedback loop then would read:

$A \rightarrow + \rightarrow \alpha \rightarrow + \rightarrow A$ .

However, if one is also interested in the role of ice temperature ( $T$ ) one could add it to the loop:

$A \rightarrow + \rightarrow \alpha \rightarrow - \rightarrow T \rightarrow - \rightarrow A$ .

Though  $T$  can be regarded as a quantity derived from  $\alpha$  and thus might be regarded as redundant for the overall feedback, its introduction adds detail to the loop, shedding light onto the physics that are behind the connection between  $\alpha$  and  $A$ . We think that the same holds for the basal traction in the two upper loops of our Fig. 2. Leaving it out in our view would oversimplify the diagrams since the basal friction takes a very relevant role in connecting till water and ice velocity/thickness. We thus would like to keep the two upper loops as they are but only modify the bottom loop (see our comments below).

*I'm not sure about the stabilization phase (P5, L17) being a separate negative feedback system (blue loop). First, it has the same time scale as the surge phase. My naïve reading of this is that at some point, the thinner colder ice means that melt-rate starts to drop, so that  $dW/dt < 0$ , then the same positive feedback that caused the surge )ie*

*$W \rightarrow + \rightarrow V \rightarrow + \rightarrow W$  works in reverse ( $W \rightarrow - \rightarrow V \rightarrow - \rightarrow W$ ). I'm no surge expert though – do other authors agree with you?*

After an in-depth discussion of this issue we came to the conclusion that the surge loop indeed

also plays a role during the stabilization phase, as soon as the till water has reached its maximum and starts to drop (red loop in reverse, as suggested by the reviewer). However, we are convinced that the stoppage of self-enforced surging requires a counteracting negative feedback which has to be in effect simultaneously with the positive surging feedback which leads to stabilization. This would not be the case when only considering the self-enforcing (red) loop since the change of sign in  $dW/dt$  mentioned by the reviewer could not be realized (during surging till water would simply grow and grow since the feedback is self-enforcing).

We think that during the surge phase the effect of the velocity increase on the ice-sheet thickness forms the negative feedback that is required to counteract the surge feedback and hence is responsible for the stabilization (blue feedback loop). This feedback loop is indeed in accordance with the reviewer's reading of the processes: increasing ice velocity leads to smaller overall ice thickness which means less till water production (via lower basal melt rate). Through larger basal friction the ice flow acceleration decreases and the ice thickness can stabilize. The difference in the time scale between the red and blue loops lies in the faster response of the till water to a velocity increase compared to the relatively long time it takes until the velocity-driven discharge has thinned the ice sheet sufficiently (and which then cools, as mentioned by the reviewer) such that the melt rate drops (and thus till water) and the ice sheet can stabilize. As requested by the reviewer, we now go into this in more detail in the text (p. 5, l. 25-27 and 29-31). To simplify Fig. 2 we removed the derived quantity ice flux  $Q$  (see reviewer comment above) in the bottom of the figure. As mentioned above, we agree with the reviewer that also the surge loop (in reverse fashion) is at play during the stabilization which we now make clear in the text and would offer to additionally put a blue arrow between  $V$  and  $W$ . However, preferably and for the sake of simplicity we would like to leave the figure in the revised submitted form.

*I wanted to read some discussion of the relationship between the various equations and time scales comes about (e.g, what is the source of the 1.8 ky scale – the drainage rate, or the time taken to advect cold ice from the divide, or something else. Should it be a surprise that it is not much affected by SSA stresses, which tend to have limited importance far upstream from the GL)*

It is indeed worthwhile to have a more detailed discussion of the time scale as pointed out by the reviewer. Our revised conclusion/discussion section now discusses the surge time scale dependent on the examined bed strength, surface accumulation and sliding-law exponent, and includes a comparison to time scales found in other studies. In the new Sec. 3.2 now we also give a physical reasoning on how the above mentioned variables affect the time scale (p. 7, l. 27-33), discussing their role in the sliding law, the basal model (Eqs. 1 and 2) and the shallow-shelf approximation of the stress balance.

*The surge-damping results are interesting, I think you could extend perhaps them . At the moment you have undamped surging ( $\phi = 10$ ) and decay to states that maintain a steady thin ice stream ( $\phi \leq 8$ ), where presumably the bed is not frozen. Do steady 'thick and slow' systems occur when  $\phi \gg 10$ .*

Looking also at the other end of the parameter range of  $\phi$ , as suggested by the reviewer, makes a lot of sense. The investigation of large values of  $\phi$  is covered by our added parameter study which reveals that there exists indeed a regime of stable flow of a rather thick ice sheet. To visualize the surge damping for  $\phi \gg 10$  we included a timeseries analogous to the one for the  $\phi \leq 8$  regime (see new Fig. 7) which is briefly analyzed in the results section (p. 6, l. 21-26).

*Like wise, it would be interesting to see what happened if you switch to  $\phi = 10$  from the  $\phi = 8$  system.*

This is indeed a very nice idea! We carried out such switching experiment for both directions (perturbing from oscillatory state into stable equilibrium and vice versa). The outcome is that the ice sheet in stable equilibrium requires a comparatively large perturbation ( $\phi = 8 \rightarrow 20$  and not  $8 \rightarrow 10$  as one could expect from the spinup experiments) in order to turn into a state of maintained surging. In contrast, a small perturbation is sufficient to bring the continuously oscillating ice sheet into a stable steady state, i.e.,  $\phi = 10 \rightarrow 8$ . The results are visualized in the new Fig. 8 and analyzed in p. 6, l. 27 – p. 7, l. 4.

*The manuscript seems to somewhat over-rate its novelty e.g*

*(1) abstract, 'we identify .. the central feedbacks' – that's a big claim. Surely others have noted the same.*

We agree with the reviewer that the term identify could be misunderstood and thus removed it.

*(2) P2, L10 "In particular, and in contrast to many of the previous studies, our simulations use a sliding law that is based on the stress balance of the ice and thereby has stress boundary conditions."*

*Some papers have considered non-linear sliding, membrane stresses, etc in studies of thermo-mechanical instabilities. Obvious examples include Hindmarsh, G.R.L, 2009 which is not cited, and Beuler and Brown 2009 (which is cited), which also describes the original version of the SSA/SIA scheme and much else regarding the PISM model used here, the major exception being Aschwanden 2012 improved PISM thermodynamics scheme. OK, the "many" makes P2,L10 technically true, but this is not the only statement of this sort, the cumulative effect is to appear to be claiming too much.*

We thank the reviewer for his advice and understand his concern. We have substituted the word "many" by "several" here (p. 2, l. 10 and 15) and also in the Methods section (p. 3 l. 6) in order to not appear overstating but at the same time account for the fact that there are a bunch of studies out there that use a much simpler representation of basal sliding. We also thank the reviewer for the additional reference, which we unintentionally did not include when writing the manuscript. We now cite Hindmarsh 2009 in the Methods section (p. 3 l. 5/6).

*(3) The connection to Heinrich events, with a ice plus basal water model (not such a nice one) is described at length in Roberts et al, Clim. Past, 12, 1601 (doi:10.5194/cp-12-1601-2016)*

We thank the reviewer for this reference, which we now cite in the introduction and in the discussion section. There we also clarify that in contrast to other studies our simulations do not capture the characteristic time scale at which Heinrich Events take place (p. 9, l. 3-8).

*Specific comments —————*

*P2, L31 "A linear interpolation of the freely evolving grounding line and accordingly interpolated basal friction enable realistic grounding-line motion similar to models of higher order (Feldmann et al., 2014)."*

*I don't think Feldmann 2014 shows this, exactly. The interpolation may represent a modest improvement but the time-dependent behaviour in Feldmann 2014 is clearly not close to*

convergent unless the mesh is resolved to around 1-2 kilometers., and indeed, the *\*non-interpolated\** (model A) results at around 1km have features seen in demonstrably resolved SSA (see the MISIP3d paper) and Stokes (see Gagliardini 2016) models that the interpolated (model B) results lack. Probably the SSA/SIA physics and 1 km resolution chosen in this paper is adequate, but Feldmann 2014 is not the main reason even if it helps. You could say “A linear interpolation of the freely evolving grounding line and accordingly interpolated basal friction, together with the use of one-sided differences\* in the driving stress close to the GL, permit SSA physics to be treated with mesh resolutions of around 1 km (Feldman et al 2014)”.  
*\*Correct? I thought you did this. I do too because I found it made a big difference, e.g (sorry to mention my own papers) [Cornford 2013 <http://dx.doi.org/10.1016/j.jcp.2012.08.037>] .whereas the interpolation helped only a bit [Cornford 2016] <https://doi.org/10.1017/aog.2016.13>.*

We thank the reviewer for the scrutiny in reading our manuscript. The use of one-sided differences in the driving stress is an important detail that we missed to mention. As suggested by the reviewer we modified the phrase accordingly and at the same formulate our statement in a less claiming manner (p.3 , l. 2-4).

P4, L7 “The superposition of both components yields a bed trough which is symmetric in both x and y directions” → reflection symmetric about  $y = 0$ , but no x-symmetry in the formulas given. I think (from other parts of the paper, that you meant symmetry about  $x = 0$  so instead of  $b(x)$  you have  $b(|x|)$ )? however, you could just say that a reflection condition ( $dh/dx = 0$ ,  $u = 0$ ,  $dv/dx = 0$ ) is satisfied at  $x = 0$

We thank the reviewer for pointing this inconsistency in the setup description. In the formula for the x component of the bed topography (p. 4, l. 7)  $b(x)$  should indeed read  $b(|x|)$ , which we corrected. To be more precise now we also mention the symmetry axes in x and y direction, respectively (p. 4, l. 11).

P4, L10 “Resulting convergent flow and associated horizontal shearing enable the emergence of ice-shelf buttressing, having a stabilizing effect on the grounding line...”. Not really “stabilizing” – even with no ice shelf there are no obvious unstable equilibria of the MISI sort in this geometry. Presumably the steady GL is further downstream than it might if the shelf was removed.

We agree with the reviewer that in our simulations buttressing does not have a stabilizing effect in the sense of inhibiting a MISI. We thus modified the phrase as suggested by the reviewer (p. 4, l. 13-14).

P5, L33, “...explained by assuming that a thinner ice sheet before the surge leads to a less dramatic surge [fine by me] and thus to a larger minimum [not fine by me]”. A less dramatic surge starting from a thinner sheet could lead to the same final thickness as a more dramatic surge starting from a thicker sheer, or pretty much any other combination.

This line of thought might indeed be a bit speculative and thus we removed the paragraph. We added two statements to the text regarding the cycle duration and till water thickness which might be easily drawn out of Fig. 6 but in our opinion are worth also to be mentioned in the text (p. 6, l. 17-18).

Fig 7. The frequency ( $w$ ) and amplitude ( $A$ ) of surges decays with  $a$ . Seems like there might be a critical  $a$  between 0.05 and 0.075 where the surging is turned on/off. I wonder how  $w$ ,  $A$  behave

*around that point? That might be an unreasonable request, depending how long the model takes to run.*

This might be indeed another interesting thing to look into. However, further simulations are beyond our means and we hope for the understanding of the reviewer.



**Interactive comment on “From Heinrich Events to cyclic ice streaming: the grow-and-surge instability in the Parallel Ice Sheet Model”**

**by**

**Johannes Feldmann and Anders Levermann**

F. Ziemen

florian.ziemen@mpimet.mpg.de

Received and published: 9 December 2016

*This is a well written paper on ice surging, and it is not the first one in this field. I enjoyed reading the paper as all findings are nicely presented.*

We would like to thank the reviewer for the positive assessment of our manuscript and the constructive comments which we address below.

*In the discussion of the results I missed a comparison of the results and mechanisms to those of other studies investigating parameter dependence of surge cycles in Heinrich events and related setups. It would be interesting to know how the results with the more sophisticated sliding scheme differ from or support those obtained with the Shallow Ice Equation (e.g. Calov et al. (2002) and Greve et al. (2006)). Greve et al. (2006) study the dependence of the surge cycles on surface mass balance and basal friction coefficient. Are the mechanisms and time scale effects comparable (similar questions for Calov et al. (2010), where more models are taken into the comparison)? Another paper that immediately comes to mind is the study by van Pelt and Oerlemans (2012), where the parameter dependence of surge cycles of a land-terminating glacier in a previous version of the same ice sheet model was studied. This calls for a comparison of the findings.*

We are glad for this helpful hint and added a paragraph to the manuscript, discussing the time scale of the surging in our simulations and comparing it to other studies, including the ones suggested above (p. 8, l. 3-31).

*In the introduction, a mentioning of the full-stokes study of cyclic ice stream behavior by Kleiner and Humbert (2014) might be appropriate.*

Thanks for the hint. We now include the reference in the introduction (p. 2, l. 8-10).

*I'm looking forward to reading the final version of the paper. Please feel free to notify me when it is published. :)*

Florian
